# Supplementary material for: Identification of 3,4-Dihydro-2H,6H-pyrimido[1,2-c][1,3]benzothiazin-6-imine Derivatives as Novel Selective Inhibitors of Plasmodium falciparum Dihydroorotate Dehydrogenase
Source: MDPI journal article supplement (doi:10.3390/ijms22137236), 2021-07-05
Supplement: s1 [file s1]

## Supplementary Materials

**Table S1:** Cytotoxicity assays of DPBI and DBIP derivatives against human cell lines (HDF, PANC-1, and DLD-1).

| Compound | EC <sub>50</sub> (μM) |        |       |
|----------|-----------------------|--------|-------|
|          | HDF                   | PANC-1 | DLD-1 |
| 1        | >10                   | >10    | >10   |
| 2        | >10                   | >10    | >10   |
| 3        | >10                   | >10    | >10   |
| 4        | >10                   | >10    | >10   |
| 5        | >10                   | >10    | >10   |
| 6        | >10                   | >10    | >10   |
| 7        | >10                   | >10    | >10   |
| 8        | >10                   | >10    | >10   |
| 9        | >10                   | >10    | >10   |
| 10       | >10                   | >10    | >10   |
| 11       | >10                   | >10    | >10   |
| 12       | >10                   | >10    | >10   |
| 13       | >10                   | >10    | >10   |
| 14       | >10                   | >10    | >10   |
| 15       | >10                   | >10    | >10   |
| 16       | >10                   | >10    | >10   |
| 17       | >10                   | >10    | >10   |
| 18       | >10                   | >10    | >10   |
| 19       | >10                   | >10    | >10   |
| 20       | >10                   | >10    | >10   |
| 21       | >10                   | >10    | >10   |
| 22       | >10                   | >10    | >10   |
| 23       | >10                   | >10    | >10   |
| 24       | >10                   | >10    | >10   |
| 25       | >10                   | >10    | >10   |
| 26       | >10                   | >10    | >10   |
| 27       | >10                   | >10    | >10   |
| 28       | >10                   | >10    | >10   |
| 29       | >10                   | >10    | >10   |
| 30       | >10                   | >10    | >10   |
| 31       | >10                   | >10    | >10   |
| 32       | >10                   | >10    | >10   |
| 33       | >10                   | >10    | >10   |
| 34       | >10                   | >10    | >10   |
| 35       | >10                   | >10    | >10   |
| 36       | 8.38 ± 0.46           | >10    | >10   |
| 37       | 8.43 ± 1.9            | >10    | >10   |
| 38       | >10                   | >10    | >10   |
| 39       | >10                   | >10    | >10   |
| 40       | 9.16 ± 1.1            | >10    | >10   |
| 41       | >10                   | >10    | >10   |
| 42       | 9.77 ± 0.28           | >10    | >10   |
| 43       | 9.44 ± 2.30           | >10    | >10   |

Data are presented as the mean ± SD (n=3)

**Figure S1:** The inhibitory activity of DPBI derivatives against PfDHODH and their chemical structures.

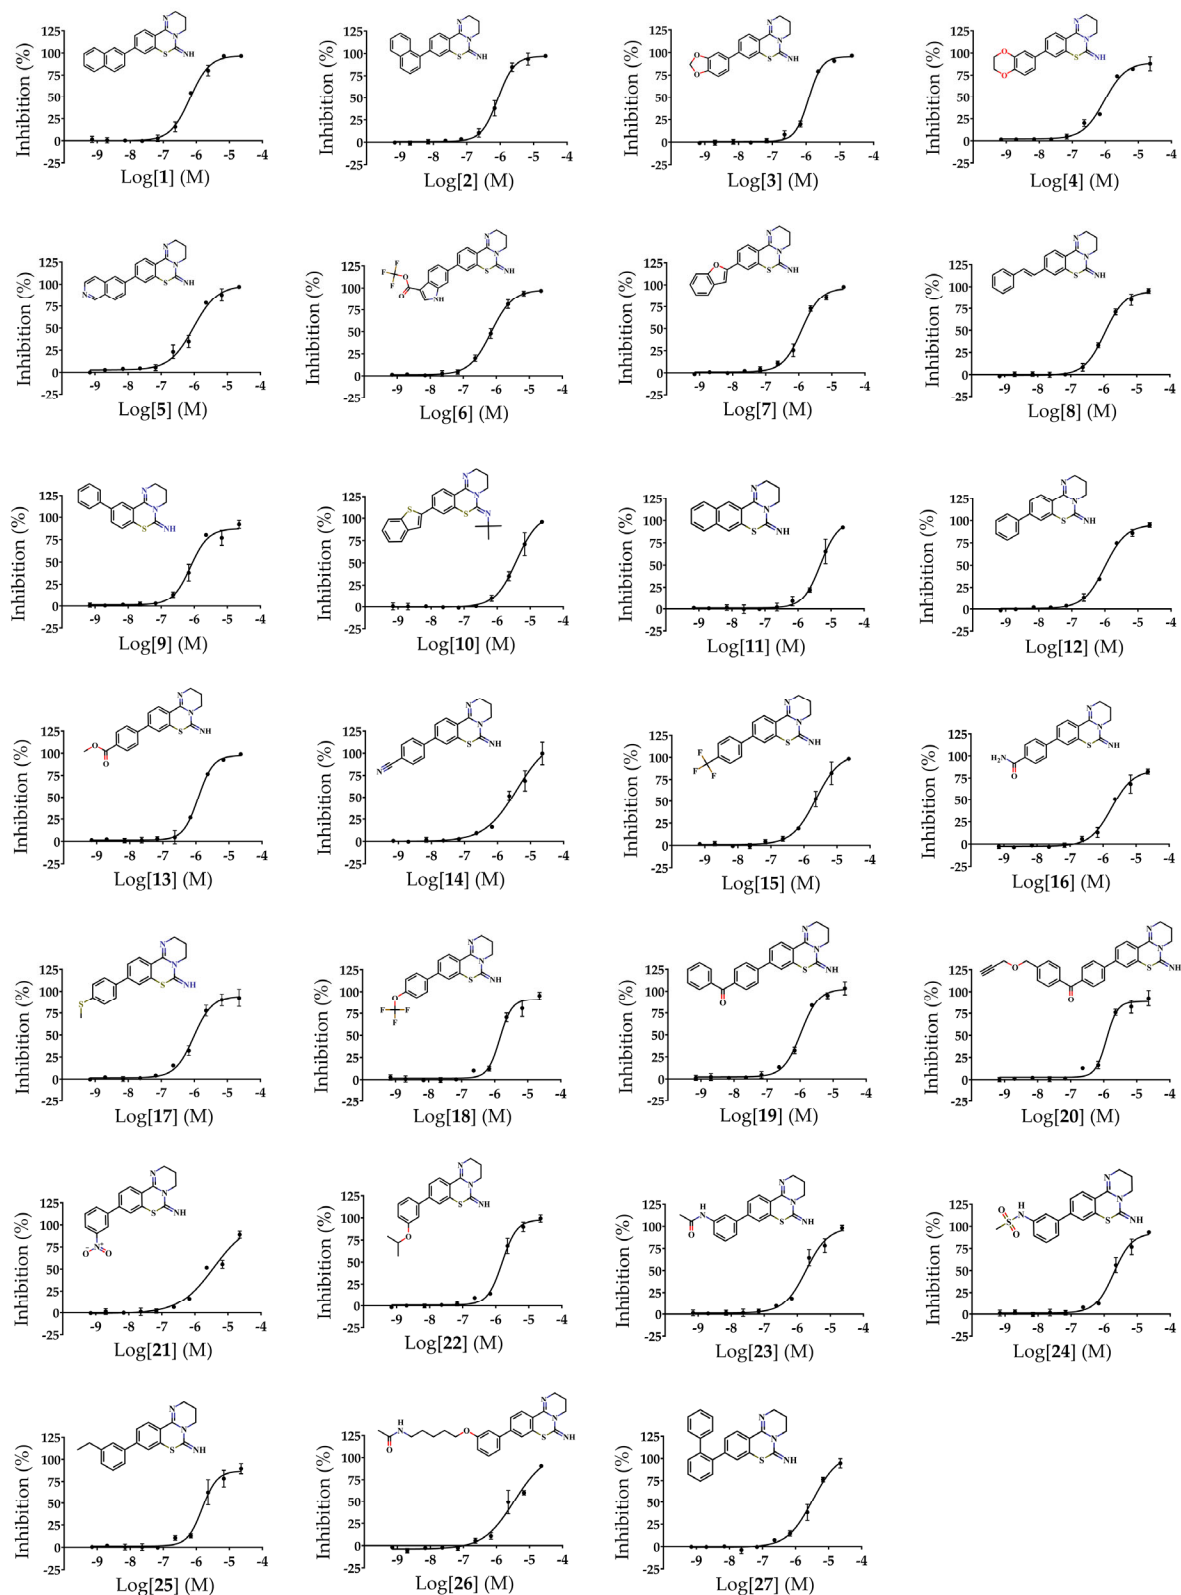

**Figure S2:** The inhibitory activity of DBIP derivatives against PfDHODH and their chemical structures.

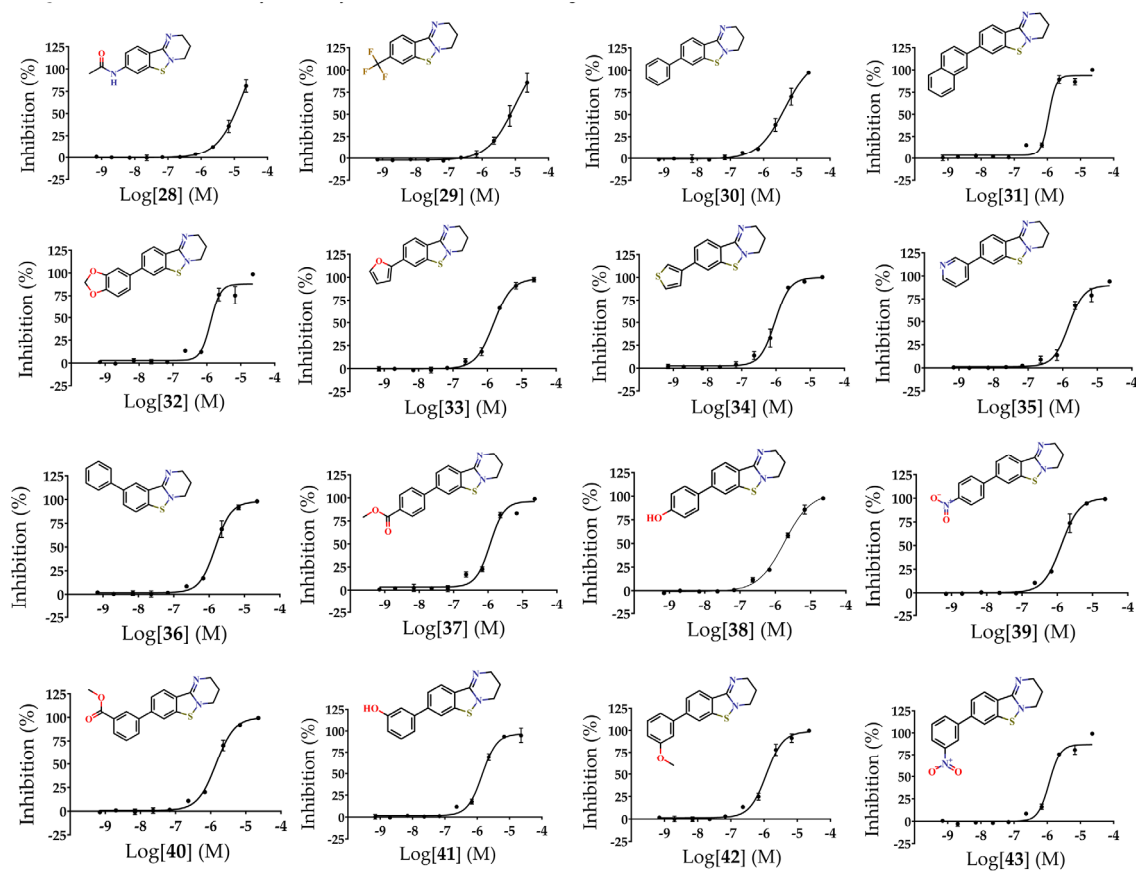

**Figure S3:** Normalized normal cell line (HDF) viability after 48 h.

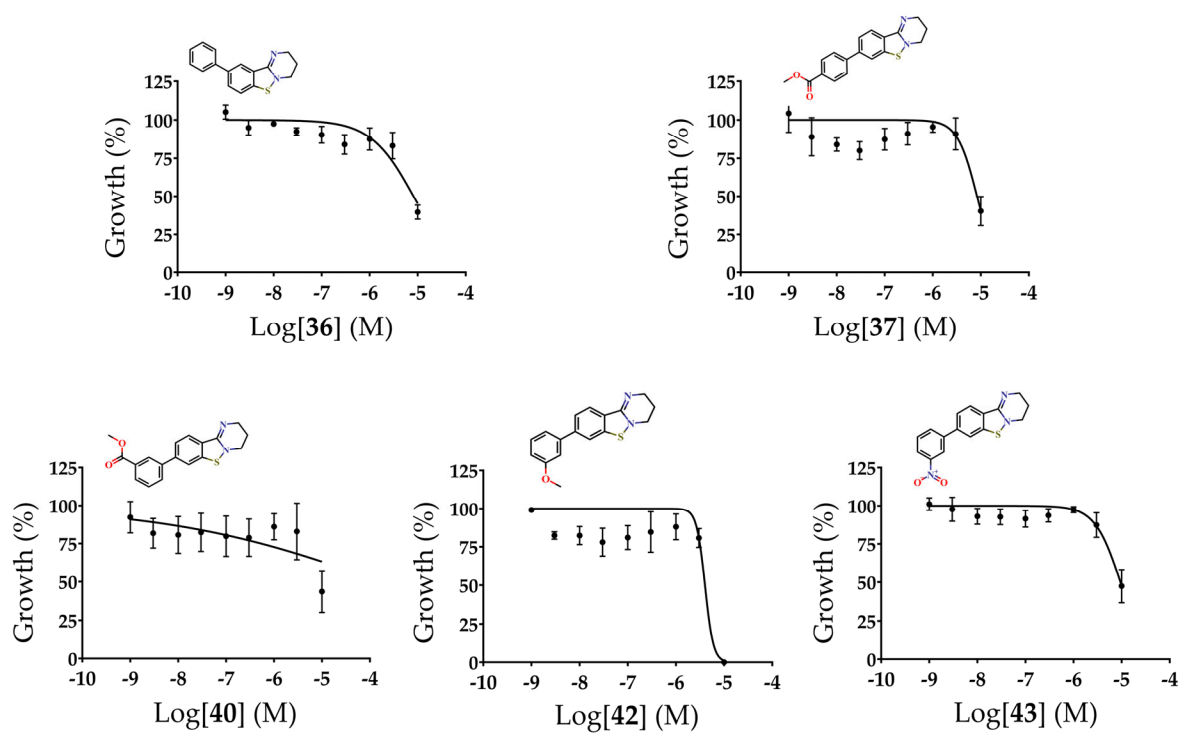

**Figure S4:** Antimalarial activity of PfDHODH inhibitors against *P. falciparum* 3D7 and 3D7-yDHODH at 10  $\mu$ M.

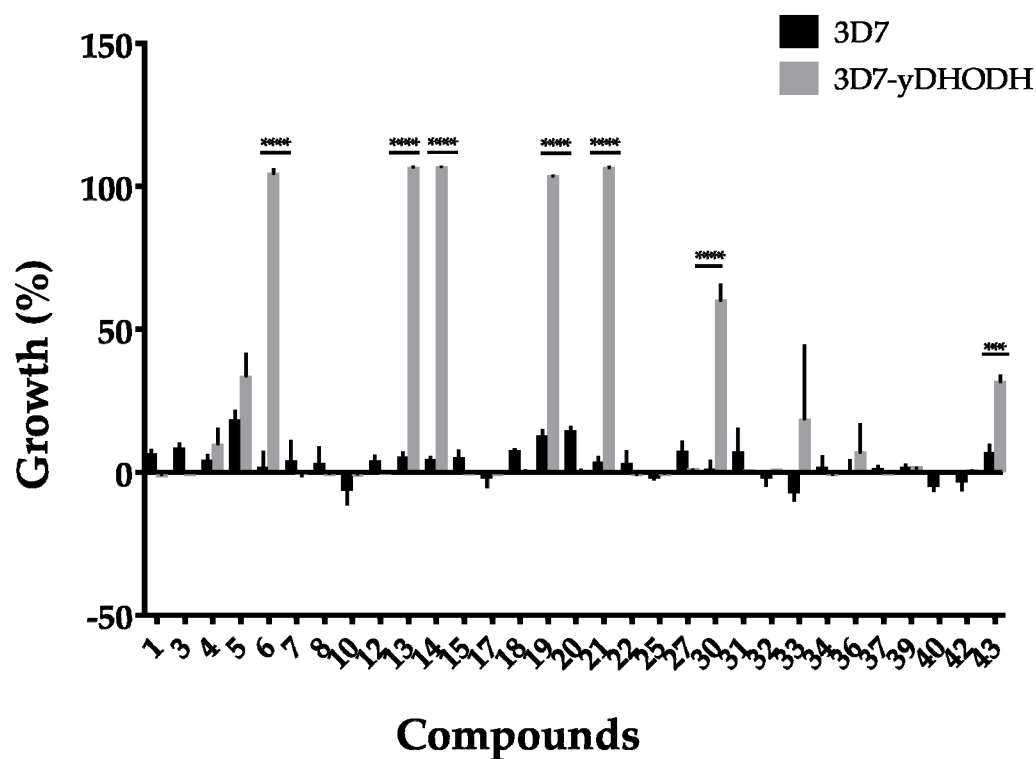

Data are presented as the mean  $\pm$  SD (n=3). Significance in difference between two parasites were tested by Student's *t* test. The asterisk marks a significant difference at the level of: \* =  $p < 0.05$ , \*\* =  $p < 0.01$ , \*\*\* =  $p < 0.001$ , \*\*\*\* =  $p < 0.0001$ .
